# Supplementary material for: SARS-CoV-2 infection and vaccination trigger long-lived B and CD4+ T lymphocytes with implications for booster strategies
Source: JCI journal article supplement (doi:10.1172/jci157990), 2022-02-09
Supplement: sd1 [file 1]

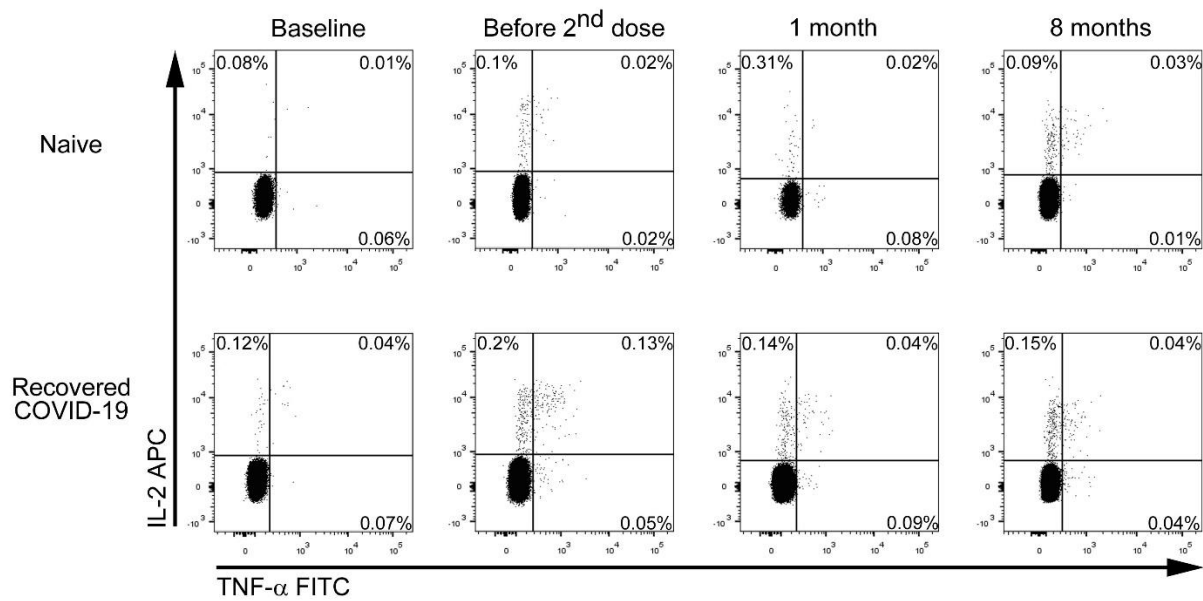

**Supplemental Figure 1**

Representative flow cytometric plots of Spike-specific CD4<sup>+</sup> IL-2<sup>+</sup> TNF-α<sup>+</sup> T cells in one naïve (upper row) and one COVID-19 recovered (lower row) subject before vaccination, before second injection and after 1 and 8 months following the complete vaccination cycle.

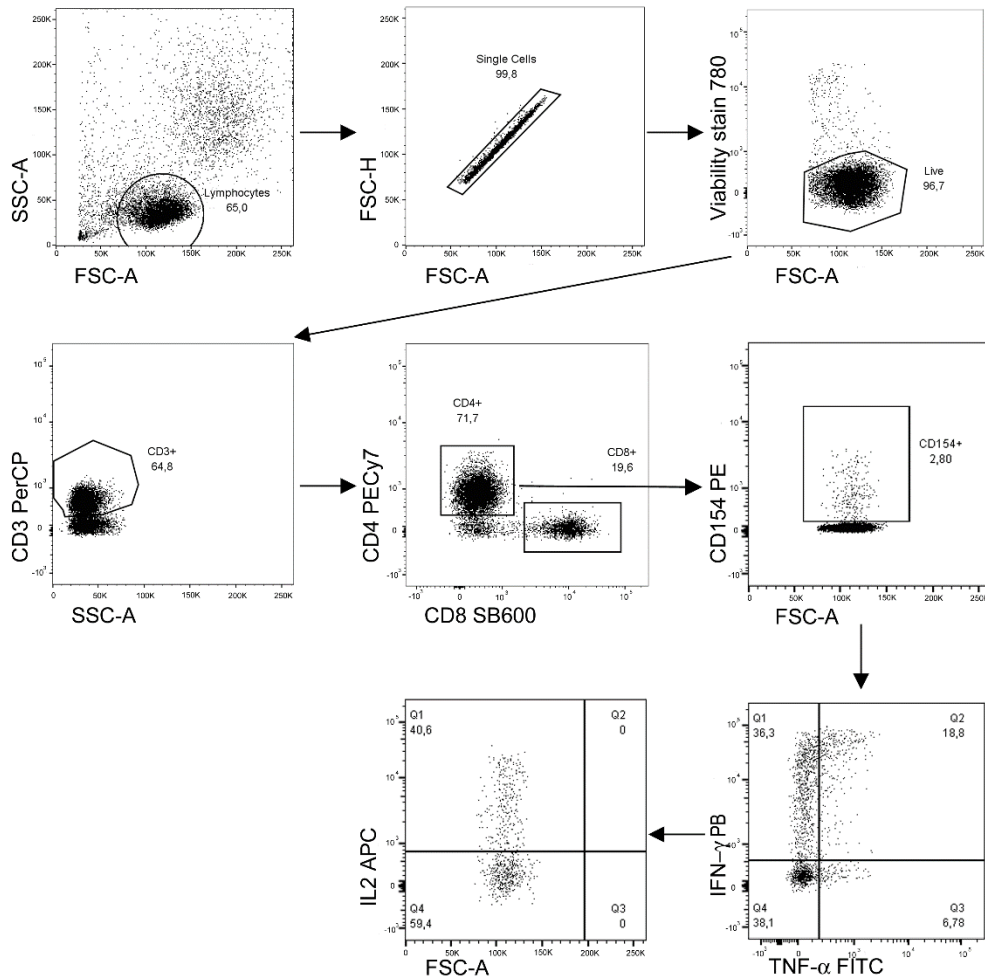

### Supplemental Figure 2. Gating strategy for the identification of spike-specific CD4+ T cells

Lymphocytes were gated based on physical parameters (FSC-SSC), then doublets were removed using FSC-A and FSC-A parameters. Dead cells were excluded using viability stain 780. T cells were identified as CD3+. We then identified CD4+ T cells. Among these, we identified CD154 expressing cells. CD4+CD154+ T cells were then evaluated for IFN- $\gamma$ , TNF- $\alpha$  and IL-2 expression.

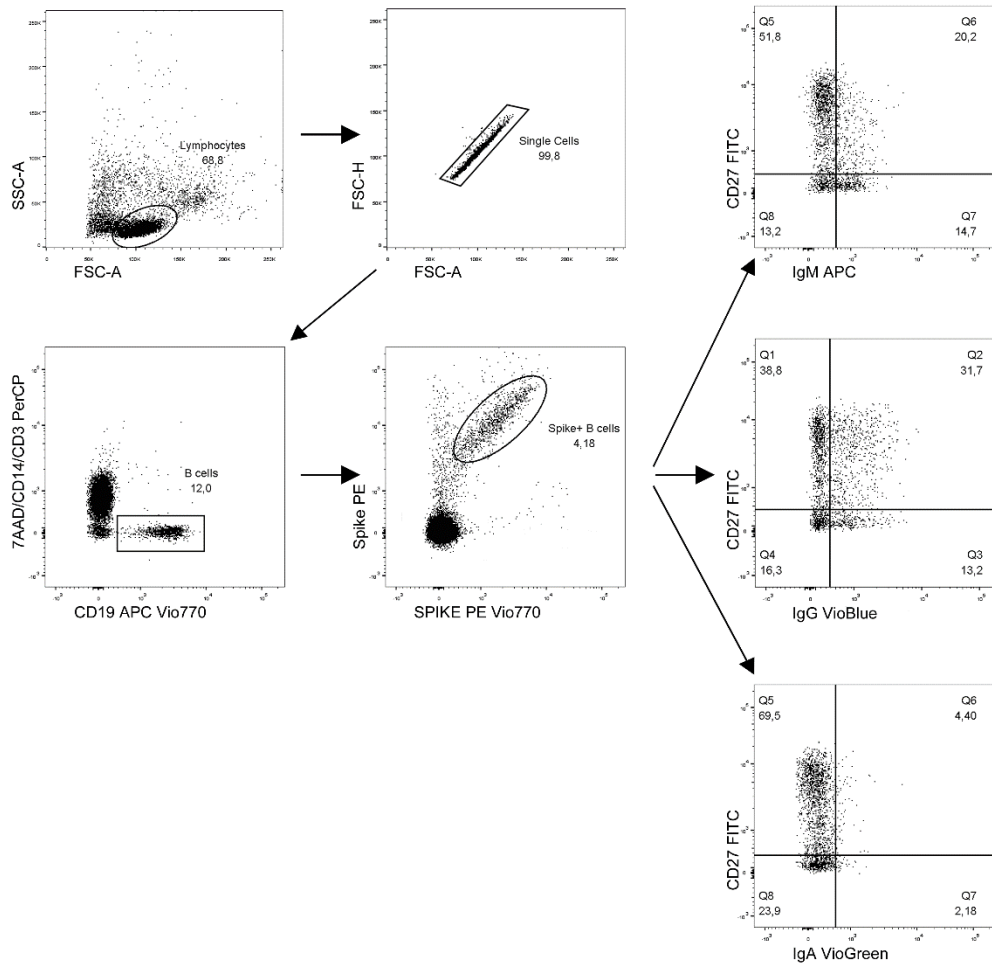

### Supplemental Figure 3: Gating strategy for the identification of spike-specific B cells

Lymphocytes were gated based on physical parameters (FSC-SSC), then doublets were removed using FSC-A and FSC-A parameters. PerCP was used as dump channel for the exclusion of dead cells (7AAD), CD3+ T cells and CD14 monocytes. B cells were identified as CD19+. B cells binding PE- and PE Vio770-conjugated spike protein were then identified as spike-specific. Among spike-specific B cells we evaluated CD27 expression associated to IgG, IgM and IgA.

**Supplemental Table S1.** Basic demographic and clinical data of 30 healthcare workers who received BNT162b2 mRNA COVID-19 vaccine and were followed up to 8 months.

|                                       | Subject ID | Age (years) | Gender | COVID-19 severity | Time from COVID-19 diagnosis <sup>o</sup> to first vaccine dose (days) |
|---------------------------------------|------------|-------------|--------|-------------------|------------------------------------------------------------------------|
| <b>COVID-19 recovered individuals</b> | R1         | 46          | male   | mild              | 214                                                                    |
|                                       | R2         | 35          | female | mild              | 58                                                                     |
|                                       | R3         | 51          | female | severe            | 294                                                                    |
|                                       | R4         | 52          | female | mild              | 286                                                                    |
|                                       | R5         | 60          | male   | moderate          | 302                                                                    |
|                                       | R6         | 65          | male   | mild              | 312                                                                    |
|                                       | R7         | 53          | female | mild              | 289                                                                    |
|                                       | R8         | 37          | male   | moderate          | 297                                                                    |
|                                       | R9         | 54          | female | mild              | 293                                                                    |
|                                       | R10        | 29          | female | mild              | 289                                                                    |
|                                       | R11        | 39          | male   | mild              | 72                                                                     |
|                                       | R12        | 61          | male   | critical          | 288                                                                    |
|                                       | R13        | 64          | male   | critical          | 292                                                                    |
|                                       | R14        | 51          | female | mild              | 222                                                                    |
|                                       | R15        | 44          | female | mild              | 306                                                                    |
| Mean±SD                               | -          | 49±11       | -      | -                 | 254±82                                                                 |
| <b>Naïve individuals</b>              | N1         | 63          | male   | na                | na                                                                     |
|                                       | N2         | 41          | female | na                | na                                                                     |
|                                       | N3         | 32          | male   | na                | na                                                                     |
|                                       | N4         | 44          | female | na                | na                                                                     |
|                                       | N5         | 35          | female | na                | na                                                                     |
|                                       | N6         | 61          | female | na                | na                                                                     |
|                                       | N7         | 41          | male   | na                | na                                                                     |
|                                       | N8         | 37          | female | na                | na                                                                     |
|                                       | N9         | 32          | male   | na                | na                                                                     |
|                                       | N10        | 28          | male   | na                | na                                                                     |
|                                       | N11        | 34          | male   | na                | na                                                                     |
|                                       | N12        | 29          | female | na                | na                                                                     |
|                                       | N13        | 46          | female | na                | na                                                                     |
|                                       | N14        | 24          | female | na                | na                                                                     |
|                                       | N15        | 53          | male   | na                | na                                                                     |
| Mean±SD                               | -          | 40±12       | -      | -                 | -                                                                      |

*na denotes not applicable*

*<sup>o</sup>first positive test on nasopharyngeal swab*

**Supplemental Table S2.** Basic demographic and clinical data of 125 healthcare workers who received BNT162b2 mRNA COVID-19 vaccine and were followed up to 6 months.

|                                                                                                                     | COVID-19 recovered individuals              | Naïve individuals      |
|---------------------------------------------------------------------------------------------------------------------|---------------------------------------------|------------------------|
| <b>No. subjects</b>                                                                                                 | 39                                          | 86                     |
| <b>Age (years)</b><br>Mean±SD                                                                                       | 50.4±11.3                                   | 45.5±14.3              |
| <b>Gender</b><br>- Male, n (%)<br>- Female, n (%)                                                                   | 12 (31.6)<br>26 (68.4)                      | 39 (45.3)<br>47 (54.6) |
| <b>COVID-19 severity</b><br>- Asymptomatic/mild, n (%)<br>- Moderate, n (%)<br>- Severe, n (%)<br>- Critical, n (%) | 31 (79.5)<br>2 (5.1)<br>2 (5.1)<br>4 (10.3) | na                     |
| <b>Time from COVID-19 diagnosis<sup>°</sup> to first vaccine dose (days)</b><br>Mean±SD                             | 230.4±93.6                                  | na                     |

na denotes not applicable

<sup>°</sup>first positive test on nasopharyngeal swab

**Supplemental Table S3.** Basic demographic and clinical data of 14 healthcare workers who received booster BNT162b2 mRNA COVID-19 vaccine injection and were followed up to one week.

|                                                       | Subject ID | Age (years) | Gender | COVID-19 severity |
|-------------------------------------------------------|------------|-------------|--------|-------------------|
| COVID-19 recovered individuals receiving booster dose | RB1        | 52          | female | severe            |
|                                                       | RB2        | 53          | female | mild              |
|                                                       | RB3        | 65          | male   | critical          |
|                                                       | RB4        | 37          | male   | moderate          |
|                                                       | RB5        | 55          | female | mild              |
|                                                       | RB6        | 62          | male   | critical          |
|                                                       | RB7        | 54          | female | mild              |
| Mean±SD                                               | -          | 54±9        | -      | -                 |
| Naïve individuals receiving booster dose              | NB1        | 45          | female | na                |
|                                                       | NB2        | 56          | female | na                |
|                                                       | NB3        | 36          | male   | na                |
|                                                       | NB4        | 36          | female | na                |
|                                                       | NB5        | 29          | male   | na                |
|                                                       | NB6        | 31          | male   | na                |
|                                                       | NB7        | 42          | male   | na                |
| Mean±SD                                               | -          | 39±9        | -      | -                 |

*na* denotes *not applicable*

**Supplemental Table S4.** Basic demographic and clinical data of 14 individuals who were hospitalized for COVID-19 between March and April 2020 and followed up to 12 months from discharge.

|                                             | Subject ID | Age (years) | Gender | COVID-19 severity |
|---------------------------------------------|------------|-------------|--------|-------------------|
| Unvaccinated COVID-19 recovered individuals | U1         | 56          | male   | moderate          |
|                                             | U2         | 61          | male   | moderate          |
|                                             | U3         | 58          | male   | severe            |
|                                             | U4         | 75          | female | severe            |
|                                             | U5         | 48          | male   | moderate          |
|                                             | U6         | 62          | male   | severe            |
|                                             | U7         | 58          | male   | critical          |
|                                             | U8         | 73          | male   | critical          |
|                                             | U9         | 73          | female | severe            |
|                                             | U10        | 56          | female | critical          |
|                                             | U11        | 56          | female | moderate          |
|                                             | U12        | 54          | female | moderate          |
|                                             | U13        | 57          | female | moderate          |
|                                             | U14        | 69          | male   | critical          |
| Mean±SD                                     | -          | 61±8        | -      | -                 |

**Supplemental Table S5. List of all fluorochrome mAbs used for flow cytometric analysis of antigen specific T cells.**

| <b>Antigen</b> | <b>Fluorochrome</b>         | <b>Clone</b> | <b>Company</b> |
|----------------|-----------------------------|--------------|----------------|
| TNF- $\alpha$  | FITC                        | 6401.1111    | BDBioscience   |
| CD154          | PE                          | TRAP1        | BDBioscience   |
| CD3            | PerCP                       | SK7          | BDBioscience   |
| CD4            | PE-Cy7                      | SK3          | Invitrogen     |
| CD8            | Super Bright 600            | SK1          | eBioscience™   |
| IL-2           | APC                         | MQ1-17H12    | BDBioscience   |
| IFN- $\gamma$  | Pacific Blue                | B27          | BioLegend      |
| L/D            | Fixable Viability Stain 780 |              | BDBioscience   |



**Supplemental Table S6. List of all fluorochrome mAbs used for flow cytometric analysis of antigen specific B cells.**

| <b>Antigen</b> | <b>Fluorochrome</b> | <b>Clone</b> | <b>Company</b>   |
|----------------|---------------------|--------------|------------------|
| CD19           | APC-Vio770          | LT19         | Miltenyi Biotect |
| CD27           | VioBright FITC      | M-T271       | Miltenyi Biotect |
| IgA            | VioGreen            | IS11-8E10    | Miltenyi Biotect |
| IgG            | VioBlue             | IS11-3B2.2.3 | Miltenyi Biotect |
| CD14           | PerCP               | TÜK4         | Miltenyi Biotect |
| IgM            | APC                 | PJ2-22H3     | Miltenyi Biotect |
| CD3            | PerCP               | BW264/56     | Miltenyi Biotect |
| 7AAD           |                     |              | Miltenyi Biotect |
| Spike          | PE                  |              | Miltenyi Biotect |
| Spike          | PE-Vio770           |              | Miltenyi Biotect |
